# Supplementary figures and images for: Exploration of Immunogenic Cell Death-Associated Genes for Predicting Prognosis and Immunological Characteristics in Cervical Squamous Cell Carcinoma
Source: Hindawi journal article supplement (doi:10.1155/2023/1405635), 2023-01-30

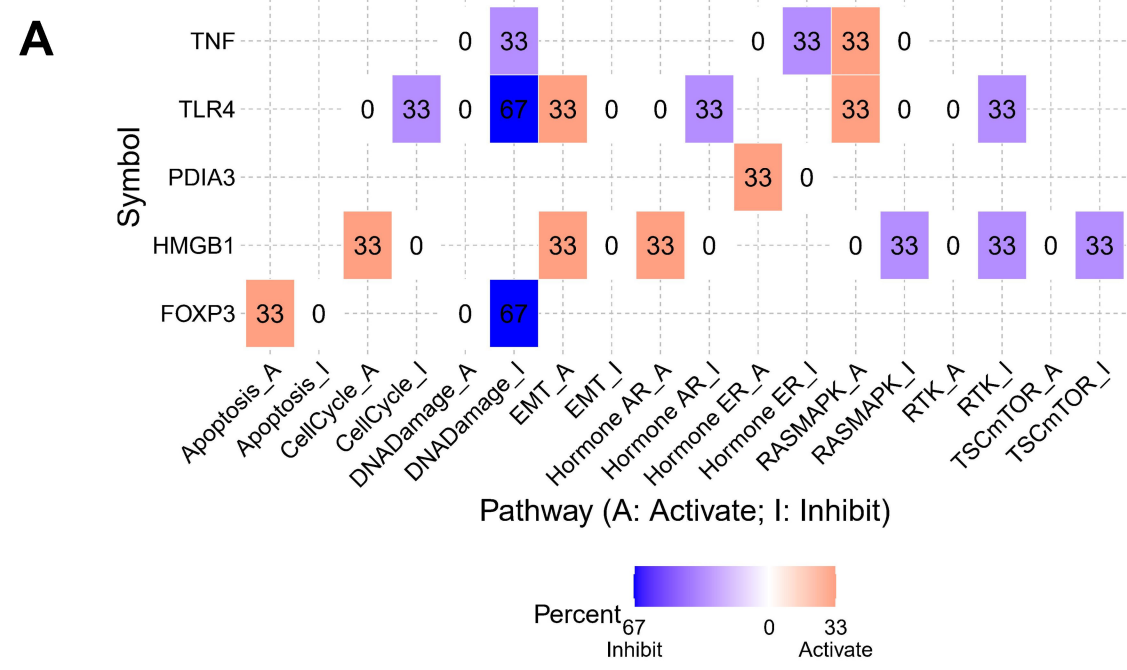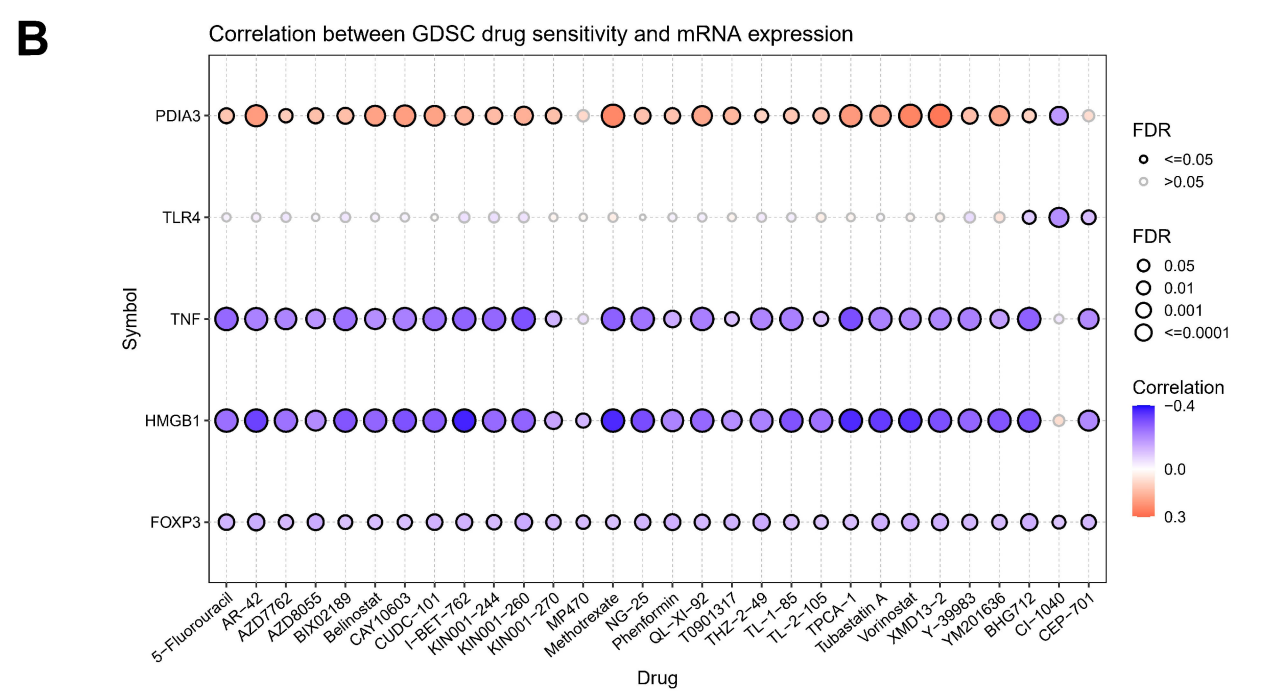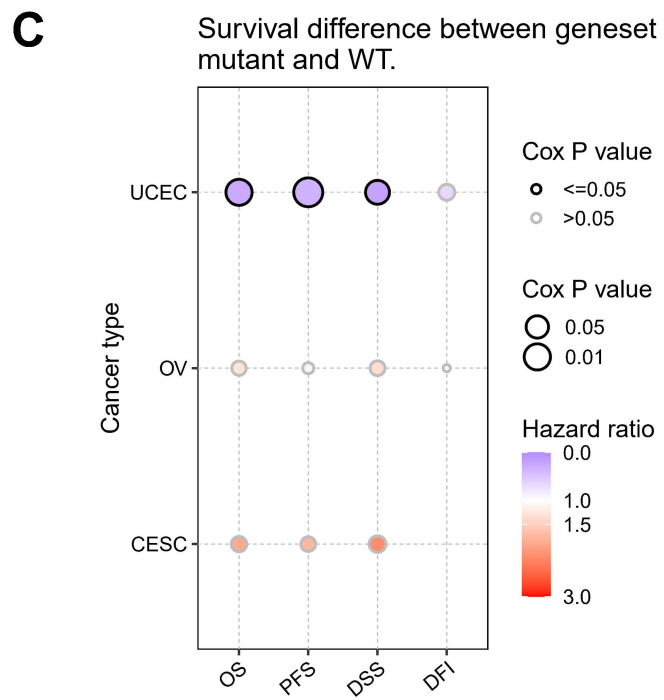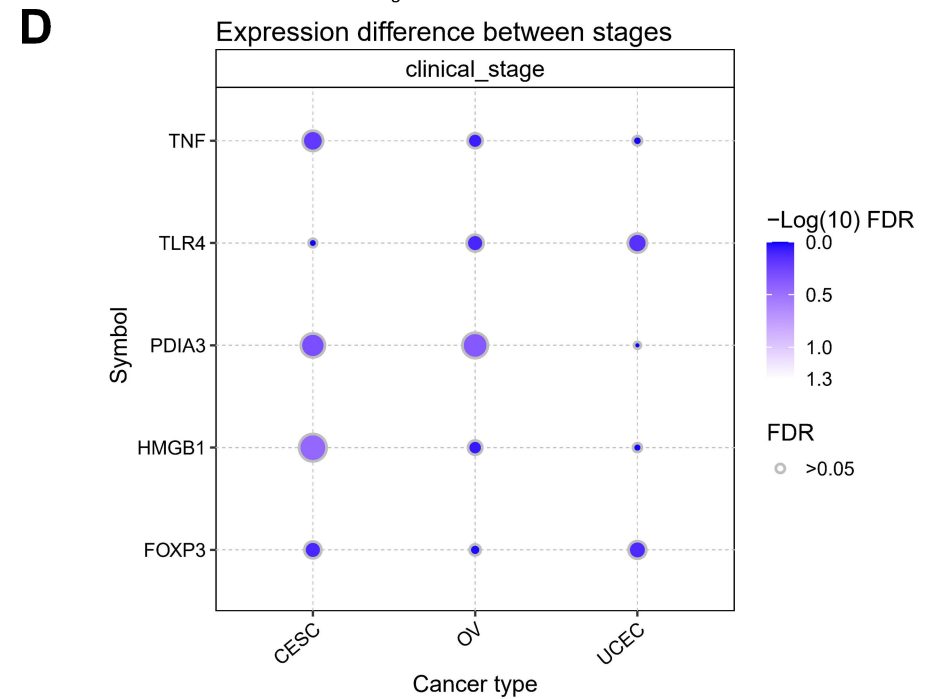

Supplement: f1 [file 1405635.f1.pdf]
